# Supplementary material
Source: PubMed Central journal article supplement (PMC3094972)
Supplement: supp_85_11_5323__1.pdf [file supp_85_11_5323__1.pdf]

# Supplementary Figure S1

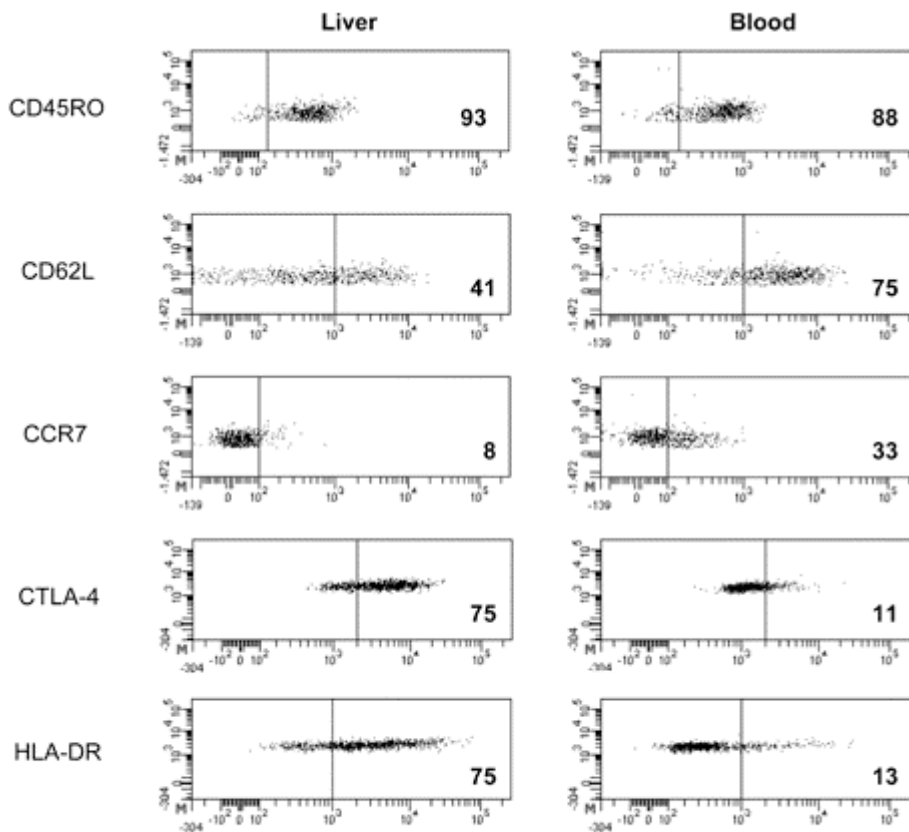

**Supplementary Figure S1. Assessment of the phenotype of intrahepatic and peripheral blood FoxP3<sup>+</sup> Treg.** (A) Using flowcytometry, CD4<sup>+</sup>CD25<sup>+</sup>FoxP3<sup>+</sup> Treg were identified as depicted in Figure 1 and further characterized by various differentiation markers (CD45RO, CD62L, CCR7) and activation markers (CTLA-4, HLA-DR). Representative dotplots are shown.
